# Supplementary material
Source: Research Square preprint supplement (doi:10.21203/rs.3.rs-8865958/v1)
Supplement: Supplementary file 1 [file cd20639bcb263196a13f5b9b.docx]

CONSORT 2010 Flow Diagram

## Enrollment

Randomized (n=64)

Assessed for eligibility (n=64)

Allocated to anterior suprascapular nerve block (GA) (n=32)

 Received allocated anterior suprascapular nerve block (n=32)

 Did not receive allocated intervention (n=0)

## Follow-Up

Allocated to posterior suprascapular nerve block (GP) (n= 32)

 Received allocated to posterior suprascapular nerve block (n=32)

 Did not receive allocated intervention (n= 0)

## Allocation

Excluded (n=0)

  Not meeting inclusion criteria (n=0)

  Declined to participate (n= 0)

  Other reasons (n=0)

GA (n=30)

GP (n=30)

## Completed

Analysed for GA (Anterior Suprascapular Nerve Block (n=30)
 Excluded from analysis (n=2)

- malfunction of the PCA device (n = 1)
- Adverse reactions (n = 1 )

Analysed for GP (Posterior Suprascapular Nerve Block (n=30)
 Excluded from analysis (n=2)

- Conversion to open surgery (n = 1)
- Adverse reactions (n = 1)

## Analysis

Lost to follow-up (n=0)

Discontinued intervention (n= 0)

Lost to follow-up (n=0)

Discontinued intervention (n=0)
